# Supplementary material for: RNA-Seq Provides Insights into the Mechanisms Underlying Ilyonectria robusta Responding to Secondary Metabolites of Bacillus methylotrophicus NJ13
Source: MDPI journal article supplement (doi:10.3390/jof8080779), 2022-07-26
Supplement: s1 [file s1]

## Supplementary Materials

**Table S1.** Primers used in qRT-PCR.

| Gene id             |    |    | Primer                    |    |
|---------------------|----|----|---------------------------|----|
| evm.TU.Contig4.662  | F* | 5' | GCTTCACCGACCGCTACAACCTG   | 3' |
|                     | R* | 5' | CAGCAGCAAGCAGGTTCGAGATAC  | 3' |
| evm.TU.Contig2.1111 | F  | 5' | ACGAGAGCAGAGTGTCCAAGGAG   | 3' |
|                     | R  | 5' | GTTGACATCGGCCGAGAGGTTG    | 3' |
| evm.TU.Contig2.1123 | F  | 5' | GGGAGAGACGGGAGCCTACATTC   | 3' |
|                     | R  | 5' | ACATCATCCTCACTCGGTCCAGAG  | 3' |
| evm.TU.Contig5.810  | F  | 5' | GATCGCTCCAACCTCGCCTCAAC   | 3' |
|                     | R  | 5' | CGGCAGTTCGCTTCAAGACCTC    | 3' |
| evm.TU.Contig30.108 | F  | 5' | CATCATCAGCGACTTCACCGTCTC  | 3' |
|                     | R  | 5' | GGATGTCACCGTTGGAAGCAGAG   | 3' |
| evm.TU.Contig17.77  | F  | 5' | TGGTATGGATGGTTCGGTGGAGAG  | 3' |
|                     | R  | 5' | AGAGGCGGCGTAGGTGATGTAG    | 3' |
| evm.TU.Contig9.224  | F  | 5' | CACTGCTTTGTTTGC GGGAATCAC | 3' |
|                     | R  | 5' | CGATGTGGAACGAGTTGGTGTAGG  | 3' |
| evm.TU.Contig20.314 | F  | 5' | GCCCTGGTTTCATCTGCCTACAC   | 3' |
|                     | R  | 5' | ACCGAGAAACAAACAGCGAGACAC  | 3' |
| evm.TU.Contig1.616  | F  | 5' | CCAACGGCACTGACATCCACTG    | 3' |
|                     | R  | 5' | AGAGAAAGAAACACCAGGACAAGGC | 3' |
| evm.TU.Contig16.341 | F  | 5' | ATATACGCCTCCCTCCGAGTTAGTG | 3' |
|                     | R  | 5' | AGCCGACAATATGATGCCTGTTACC | 3' |
| evm.TU.Contig19.352 | F  | 5' | TCACGAACTGGAGGGCTTAGAGG   | 3' |
|                     | R  | 5' | CCGTCATCTGCCACTTCTACATTCC | 3' |
| evm.TU.Contig23.290 | F  | 5' | CTTGCTGAGGTCAACGGCTATGG   | 3' |
|                     | R  | 5' | ACGAGGAACAGAGGGAAGTGAAG   | 3' |
| evm.TU.Contig18.225 | F  | 5' | ACTCGGATGTTTGGGTTGGTTGG   | 3' |
|                     | R  | 5' | GTCATACGCAACGCCAGTAGAGG   | 3' |
| evm.TU.Contig13.313 | F  | 5' | CGCTGCTCTTATCGCTGCTCTC    | 3' |
|                     | R  | 5' | ACTTCTTCATGCCACCATCGTAGC  | 3' |
| novel.1805          | F  | 5' | TCTTGGCTTGGCTGGATCTTGAATG | 3' |
|                     | R  | 5' | TGTGGTTGGATAAAACGACGGGAAG | 3' |
| novel.2288          | F  | 5' | CGGCTATGTTGTTGCGGAGGAC    | 3' |
|                     | R  | 5' | CAACCTTACCGGAACCGAGAAGTG  | 3' |
| novel.2293          | F  | 5' | CCGTTCTTCTTGCCGTCCTCC     | 3' |
|                     | R  | 5' | TTCAAGGATGCGAAGCCGTCAG    | 3' |

\* Forward primer or Reversed primer

**Table S2.** Quality analysis of RNA-Seq sequencing data.

| Sample   | Raw reads | Clean reads | Clean bases | Error rate(%) | Q20 (%) | Q30 (%) | GC (%) | Total map        |
|----------|-----------|-------------|-------------|---------------|---------|---------|--------|------------------|
| BF_R4d_1 | 49316358  | 48151054    | 7.22G       | 0.02          | 98.16   | 94.6    | 56.3   | 47254765(98.14%) |
| BF_R4d_2 | 48971862  | 47305862    | 7.1G        | 0.02          | 98.11   | 94.63   | 55.9   | 46257232(97.78%) |
| BF_R4d_3 | 49669084  | 48647556    | 7.3G        | 0.02          | 98.12   | 94.52   | 55.89  | 47745077(98.14%) |
| BF_R7d_1 | 47309784  | 46204562    | 6.93G       | 0.02          | 98.2    | 94.68   | 56.49  | 45361811(98.18%) |
| BF_R7d_2 | 48575250  | 47496712    | 7.12G       | 0.02          | 98.15   | 94.59   | 56.54  | 46717545(98.36%) |
| BF_R7d_3 | 48963314  | 47962720    | 7.19G       | 0.03          | 97.8    | 93.73   | 56.64  | 47058908(98.12%) |
| R4d_1    | 48905388  | 47588660    | 7.14G       | 0.02          | 98.09   | 94.49   | 55.57  | 46621126(97.97%) |
| R4d_2    | 47784000  | 46263794    | 6.94G       | 0.02          | 98.08   | 94.42   | 55.18  | 45376497(98.08%) |
| R4d_3    | 47735346  | 46341570    | 6.95G       | 0.02          | 98.19   | 94.73   | 55.51  | 45502131(98.19%) |
| R7d_1    | 50522322  | 49517844    | 7.43G       | 0.02          | 98.12   | 94.49   | 56.07  | 48434677(97.81%) |
| R7d_2    | 55207722  | 54225066    | 8.13G       | 0.02          | 98.25   | 94.78   | 56.52  | 53480130(98.63%) |
| R7d_3    | 47240898  | 46161110    | 6.92G       | 0.02          | 98.21   | 94.71   | 56.51  | 45376885(98.3%)  |

**Table S3.** Gene annotation and expression analysis of potential response genes in strain CBLJ-3.

|                                          | Log2 (Fold change) |                  | Padj          |               |                                                                                                           |
|------------------------------------------|--------------------|------------------|---------------|---------------|-----------------------------------------------------------------------------------------------------------|
| Gene id                                  | BF_R4d vs R4d      | BF_R7d vs R7d    | BF_R4d vs R4d | BF_R7d vs R7d | Gene description                                                                                          |
| Genes encoding glucose transporter       |                    |                  |               |               |                                                                                                           |
| evm.TU.Con<br>tig22.20                   | −1.227306797       | -                | 0.006217354   | -             | Hexose transporter 13 / Multicopy suppressor of snf4 deficiency protein 1 / Sugar (and other) transporter |
| evm.TU.Con<br>tig18.121                  | −1.091109424       | -                | 0.009672643   | -             | High-affinity glucose transporter RGT2 / Sugar (and other) transporter                                    |
| evm.TU.Con<br>tig13.217                  | −1.115730235       | -                | 0.010275477   | -             | High-affinity glucose transporter SNF3 / Sugar (and other) transporter                                    |
| evm.TU.Con<br>tig7.598                   | −1.54689462        | -                | 0.011735671   | -             | High-affinity glucose transporter HXT2 / Sugar (and other) transporter                                    |
| evm.TU.Con<br>tig5.632                   | −1.449666379       | -                | 0.048741531   | -             | Probable glucose transporter rco-3 / Sugar (and other) transporter                                        |
| evm.TU.Con<br>tig2.918                   | -                  | -<br>1.725870496 | -             | 3.13519E−06   | Hexose transporter 1 / Sugar (and other) transporter                                                      |
| Related genes to damage fungal cell wall |                    |                  |               |               |                                                                                                           |
| evm.TU.Con<br>tig11.337                  | 1.945310073        | -                | 3.71275E−13   | -             | Probable endo-β-1,4-glucanase D / Glycosyl hydrolase family 61                                            |
| evm.TU.Con<br>tig16.235                  | 1.813632607        | -                | 1.46054E−09   | -             | Endo-1,4-β-glucanase IV / Glycosyl hydrolase family 61                                                    |
| evm.TU.Con<br>tig28.214                  | 4.830898872        | -                | 3.67092E−09   | -             | Probable xyloglucan-specific endo-β-1,4-glucanase A / Glycosyl hydrolase family 12                        |
| evm.TU.Con<br>tig19.313                  | 2.234198949        | -                | 3.24014E−06   | -             | Probable xyloglucan-specific endo-β-1,4-glucanase A / Glycosyl hydrolase family 12                        |
| evm.TU.Con<br>tig28.103                  | 3.277833959        | -                | 1.42353E−05   | -             | Probable xyloglucan-specific endo-β-1,4-glucanase A / Glycosyl hydrolase family 12                        |
| evm.TU.Con<br>tig18.203                  | 2.025644872        | -                | 0.000281974   | -             | Glucan endo-1,6-β-glucosidase B / Glycosyl hydrolase family 5                                             |
| evm.TU.Con<br>tig18.225                  | 5.385803234        | -                | 0.000219848   | -             | Endo-β-1,4-glucanase B / Glycosyl hydrolase family 5                                                      |
| evm.TU.Con<br>tig1.720                   | 1.490552348        | -                | 4.73746E−05   | -             | Probable endo-1,3(4)-β-glucanase / Glycosyl hydrolases family 16                                          |
| evm.TU.Con<br>tig20.16                   | -                  | 2.925360733      | -             | 5.55525E−05   | Chitinase-1 / Glycosyl hydrolases family 18                                                               |
| evm.TU.Con<br>tig30.145                  | -                  | 1.127720541      | -             | 0.039018451   | Chitinase-1 / Glycosyl hydrolases family 18                                                               |

|                                          |              |              |             |             |                                                                                                  |
|------------------------------------------|--------------|--------------|-------------|-------------|--------------------------------------------------------------------------------------------------|
| evm.TU.Con<br>tig32.86                   | 1.052093729  | -            | -           | 0.029231604 | Glycosyl hydrolases family 18                                                                    |
| evm.TU.Con<br>tig19.330                  | -2.284435178 | -            | -           | 1.20E-12    | Chitin synthase                                                                                  |
| evm.TU.Con<br>tig1.1596                  | -2.073600898 | -            | -           | 0.010060275 | Chitin synthase D / Chitin synthase                                                              |
| <b>Sterol synthesis / transfer genes</b> |              |              |             |             |                                                                                                  |
| evm.TU.Con<br>tig23.290                  | 1.420367125  | -            | 3.90E-06    | -           | Probable Delta(7)-sterol 5(6)-desaturase / C-5 sterol desaturase / Sterol-C5-desaturase          |
| evm.TU.Con<br>tig2.306                   | 1.383905973  | -            | 2.28E-05    | -           | Methylsterol monooxygenase / C-4 methylsterol oxidase                                            |
| evm.TU.Con<br>tig6.165                   | 2.730195482  | 1.290754477  | 0.000187141 | 0.023512876 | Sterol uptake control protein 2                                                                  |
| evm.TU.Con<br>tig6.163                   | 2.64514561   | 1.579654627  | 0.000454146 | 0.0425209   | Sterol uptake control protein 2                                                                  |
| evm.TU.Con<br>tig2.889                   | 4.01990853   | -2.140157526 | 2.73E-24    | 0.000129215 | Sterol 24-C-methyltransferase erg-4 / Delta(24)-sterol C-methyltransferase                       |
| evm.TU.Con<br>tig17.12                   | 1.033408709  | -            | 0.016699708 | -           | Sterol 24-C-methyltransferase erg-4 / Delta(24)-sterol C-methyltransferase                       |
| evm.TU.Con<br>tig97.3                    | -1.797550935 | -            | 7.58E-21    | -           | Sterol 3- $\beta$ -glucosyltransferase<br>UGT80B1 / UDP-glucose: sterol glucosyltransferase 80B1 |
| evm.TU.Con<br>tig19.352                  | -2.038076735 | -            | 1.18E-08    | -           | Sterol 3- $\beta$ -glucosyltransferase<br>UGT80A2 / UDP-glucose: sterol glucosyltransferase 80A2 |
| evm.TU.Con<br>tig16.341                  | -1.501800564 | -            | 4.65E-07    | -           | Sterol 3- $\beta$ -glucosyltransferase<br>UGT80A2 / UDP-glucose: sterol glucosyltransferase 80A2 |
| evm.TU.Con<br>tig29.33                   | -1.090541494 | -            | 0.001046147 | -           | Sterol 3- $\beta$ -glucosyltransferase<br>UGT80A2 / UDP-glucose: sterol glucosyltransferase 80A2 |
| evm.TU.Con<br>tig13.242                  | -1.106797469 | -            | 0.001354601 | -           | Sterol 3- $\beta$ -glucosyltransferase<br>UGT80A2 / UDP-glucose: sterol glucosyltransferase 80A2 |
| <b>Fungal metabolite synthesis genes</b> |              |              |             |             |                                                                                                  |
| evm.TU.Con<br>tig2.1111                  | -6.044304189 | -3.349124586 | 1.14E-42    | 0.008143923 | Highly reducing polyketide synthase<br>azaB / HR-PKS azaB                                        |
| evm.TU.Con<br>tig25.194                  | -1.762052148 | -            | 3.77E-07    | -           | Reducing polyketide synthase PKS2 /<br>T-toxin biosynthesis protein PKS2                         |

|                              |              |              |             |             |                                                                                                              |
|------------------------------|--------------|--------------|-------------|-------------|--------------------------------------------------------------------------------------------------------------|
| evm.TU.Con<br>tig4.114       | −1.038261919 | -            | 0.016361089 | -           | Fusarin C cluster PKS/NRPS FUS1 /<br>Fusarin biosynthesis megasynthetase /<br>Fusarin biosynthesis protein 1 |
| evm.TU.Con<br>tig2.1106      | −4.873128    | −3.191589465 | 1.03E−18    | 0.000369083 | Nonribosomal peptide synthetase 8                                                                            |
| evm.TU.Con<br>tig2.1120      | −4.881269357 | −3.139340497 | 4.55E−43    | 0.007720758 | Nonribosomal peptide synthetase<br>dtxS1 / Destruxin synthase dtxS1 /<br>Destruxin synthesis protein 1       |
| evm.TU.Con<br>tig2.1105      | −2.668034775 | -            | 0.000104188 | -           | Nonribosomal peptide synthetase 12                                                                           |
| <b>Drug resistance genes</b> |              |              |             |             |                                                                                                              |
| evm.TU.Con<br>tig1.616       | 1.98265593   | -            | 2.80E−13    | -           | Major facilitator superfamily                                                                                |
| evm.TU.Con<br>tig10.57       | 1.871783393  | -            | 1.26E−08    | -           | Major facilitator super-<br>family                                                                           |
| evm.TU.Con<br>tig20.314      | 1.517785056  | -            | 3.72E−08    | -           | Major facilitator superfamily                                                                                |
| evm.TU.Con<br>tig17.77       | 2.679730677  | -            | 0.029912132 | -           | Major facilitator superfamily                                                                                |
| evm.TU.Con<br>tig24.56       | 1.932600128  | -            | 0.002120793 | -           | Pleiotropic ABC efflux transporter of<br>multiple drugs CDR1/CDR ABC trans-<br>porter                        |
| evm.TU.Con<br>tig17.72       | 2.345504487  | -            | 0.000415221 | -           | Multidrug resistance protein CDR1 /<br>CDR ABC transporter                                                   |
| evm.TU.Con<br>tig19.290      | 3.363687782  | -            | 1.71E−09    | -           | ABC transporter CDR4 / CDR ABC<br>transporter                                                                |
| evm.TU.Con<br>tig5.810       | 5.280572337  | -            | 0.021739634 | -           | Multidrug resistance protein CDR2 /<br>CDR ABC transporter                                                   |
| <b>DEGs of hub genes</b>     |              |              |             |             |                                                                                                              |
| evm.TU.Con<br>tig2.1115      | −4.83003     | -            | 7.59E−19    | -           | L-aspartate decarboxylase dtxS4 /<br>Destruxin synthesis protein 4                                           |
| evm.TU.Con<br>tig23.121      | −1.05853     | -            | 0.000384    | -           | Glutamate/Leucine/Phe-<br>nylalanine/Valine dehy-<br>drogenase                                               |
| evm.TU.Con<br>tig13.145      | -            | −1.94912     | -           | 3.57E−09    | Heat shock protein 90 homolog /<br>Hsp90 protein                                                             |
| evm.TU.Con<br>tig3.801       | -            | −1.77591     | -           | 5.79E−08    | Heat shock 70 kDa protein / Hsp70<br>protein                                                                 |

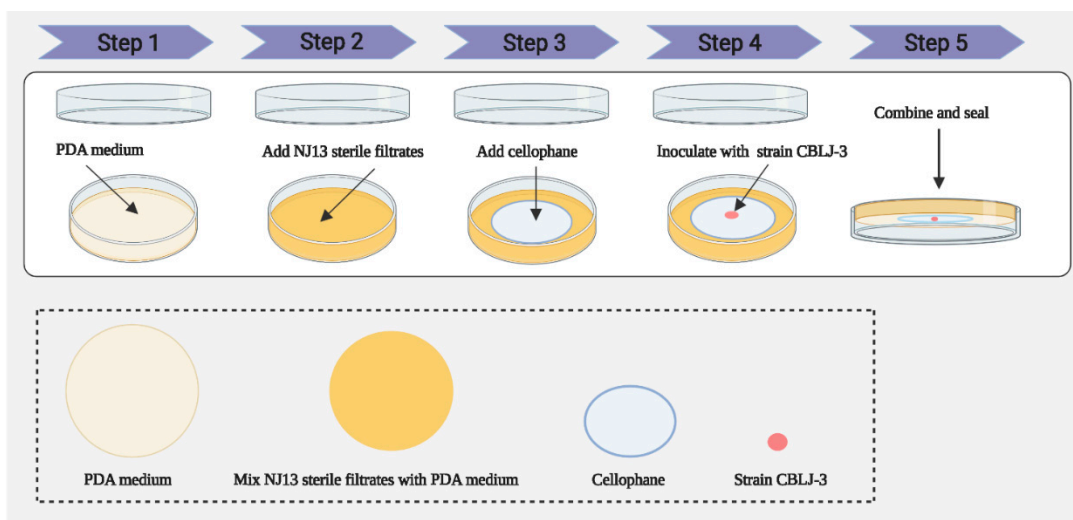

**Figure S1.** Procedure used for the interaction of CBLJ-3 with NJ13 sterile filtrates. Created with Biorender.com (<https://biorender.com>, accessed on 9 April 2020).

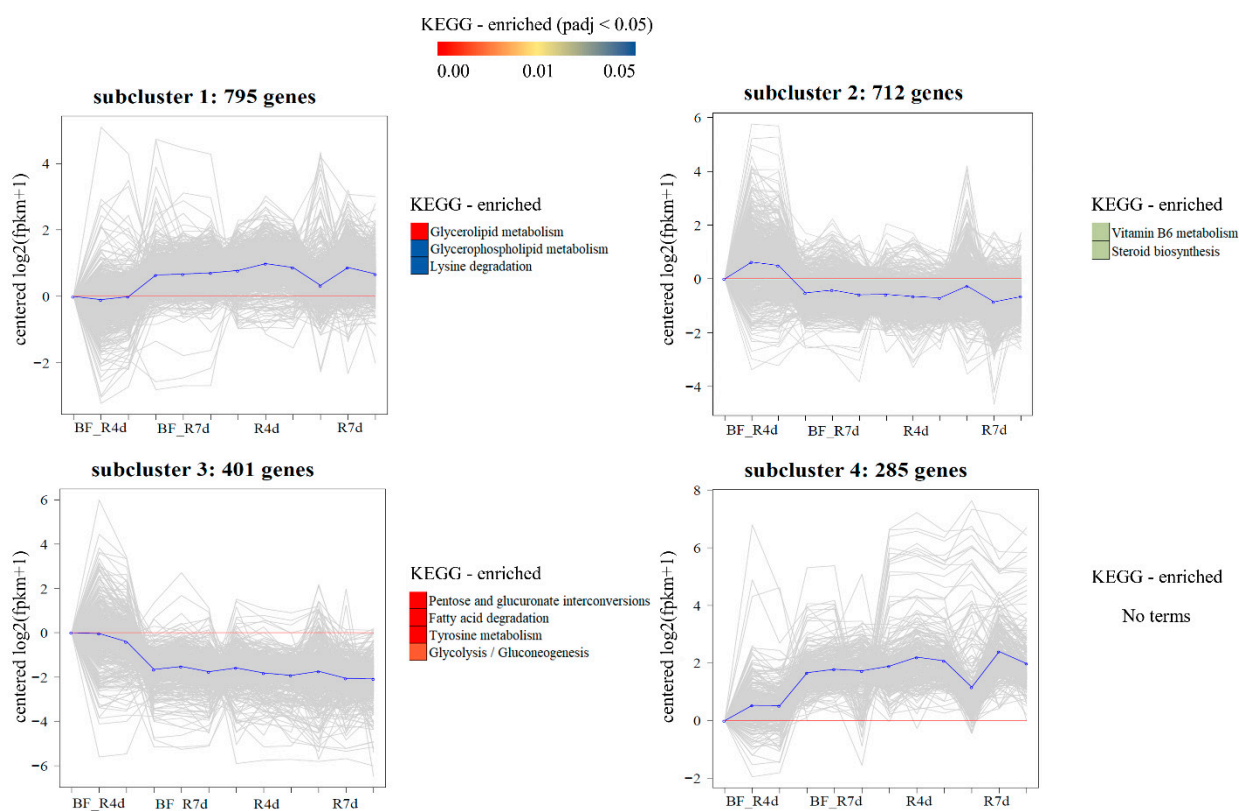

**Figure S2.** Analysis of KEGG category distribution of DEGs in the four co-expression subclusters constituting the transcriptome of CBLJ-3 under NJ13 sterile filtrates stress. The abscissa is the sample name, and the ordinate is the expression value corrected by the centralized logarithm. The gray line indicates the expression level of genes in the subclusters under different experimental conditions, and the blue line indicates the average expression value of all DEGs in the subcluster under different experimental conditions. By using clusterProfiler R package (Southern Medical University, Guangzhou, China) and  $p \text{ adj} < 0.05$ , the KEGG enrichment analysis was computed.

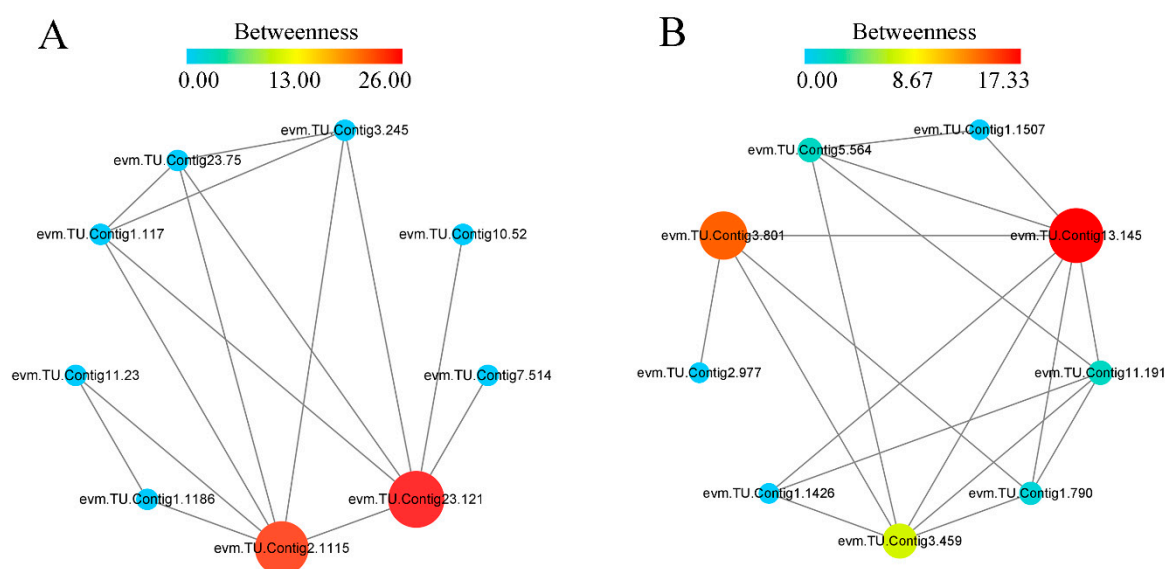

**Figure S3.** PPI analysis of DEGs at 4 dpi and 7 dpi by the "Betweenness Centrality" method. (A) BF\_R4d vs R4d. (B) BF\_R7d vs R7d.

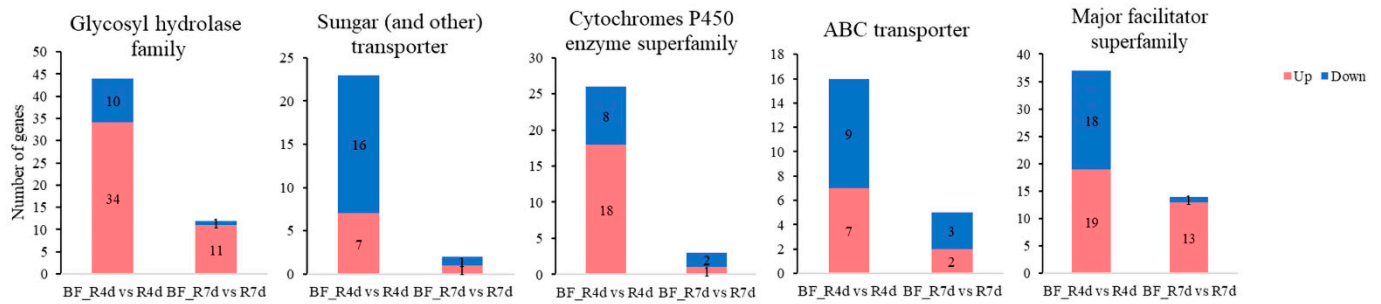

**Figure S4.** Based on transcriptomic annotation analysis, taxonomic analysis of DEGs. ( $|\log_2(\text{fold change})| > 1$ ,  $p_{\text{adj}} < 0.05$ ).

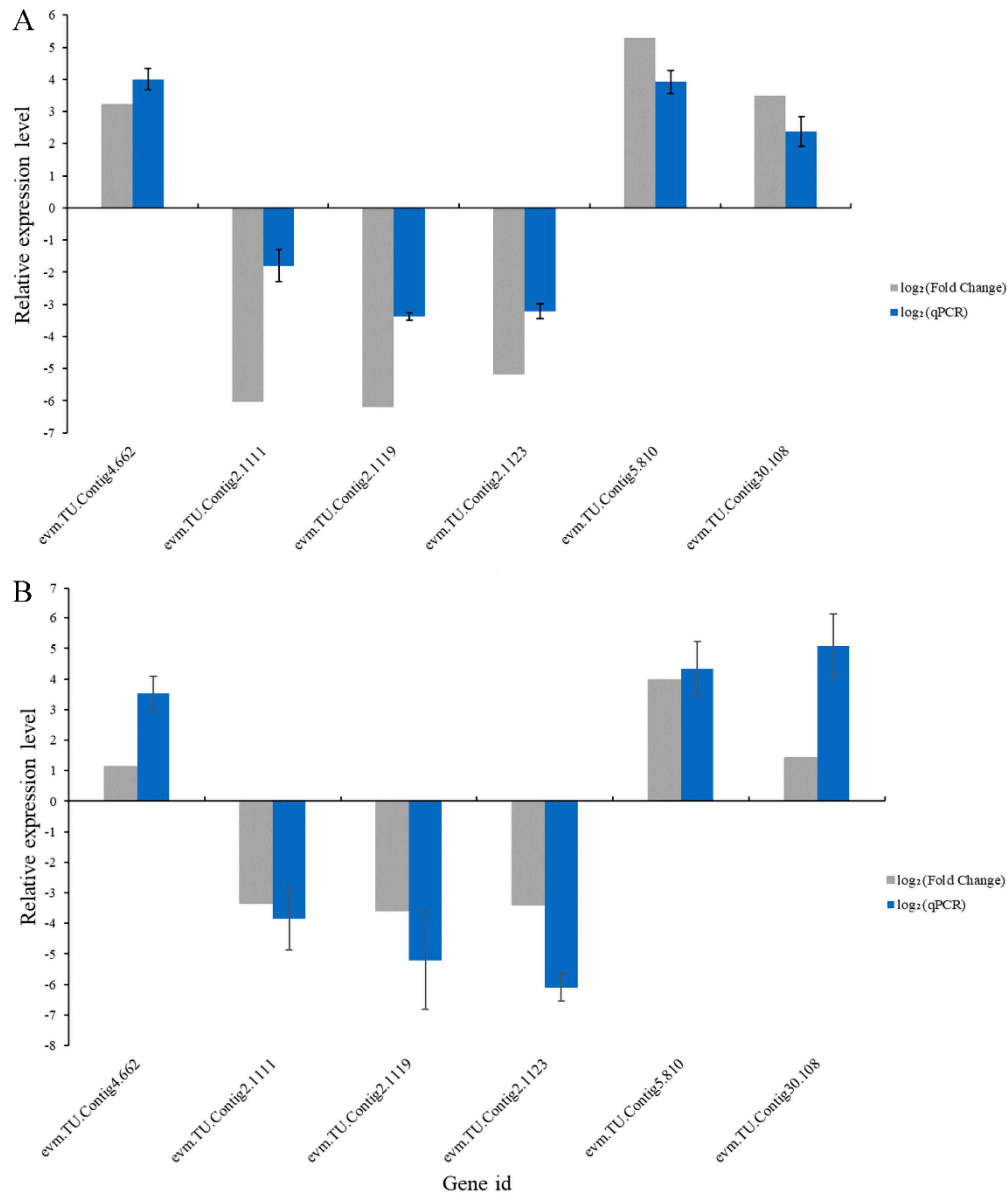

**Figure S5.** Relative expression level of 6 DEGs in (A) BF\_R4d vs R4d and (B) BF\_R7d vs R7d using reference gene  $\beta$ -actin for normalization by qRT-PCR included evm.TU.Contig4.662 (endo-1,4-beta-xylanase 1), evm.TU.Contig2.1111 (highly reducing polyketide synthase azaB), evm.TU.Contig2.1119 (acetohydroxy-acid synthase catalytic subunit AHAS), evm.TU.Contig2.1123 (putative sterigmatocystin biosynthesis peroxidase stcC), evm.TU.Contig5.810 (multidrug resistance protein CDR2), and evm.TU.Contig30.108 (pectate lyase). The X-axis indicates the name of the DEGs, and the Y-axis indicates the relative expression of the DEGs.
